# Supplementary material for: Cell-type specific requirements for thiol/disulfide exchange during HIV-1 entry and infection
Source: Springer Nature journal article supplement (doi:10.1186/1742-4690-9-97), 2012-12-01
Supplement: 12977_2012_3370_MOESM4_ESM.pdf [file 12977_2012_3370_MOESM4_ESM.pdf]

### A PM-1 HIV-1<sub>JR-FL</sub> Luc

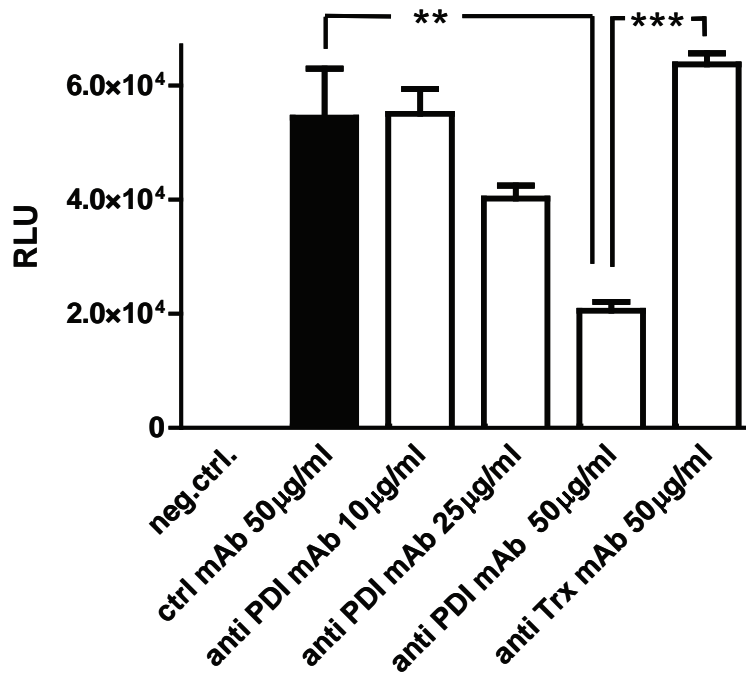

### B

#### HIV-1<sub>ADA</sub>

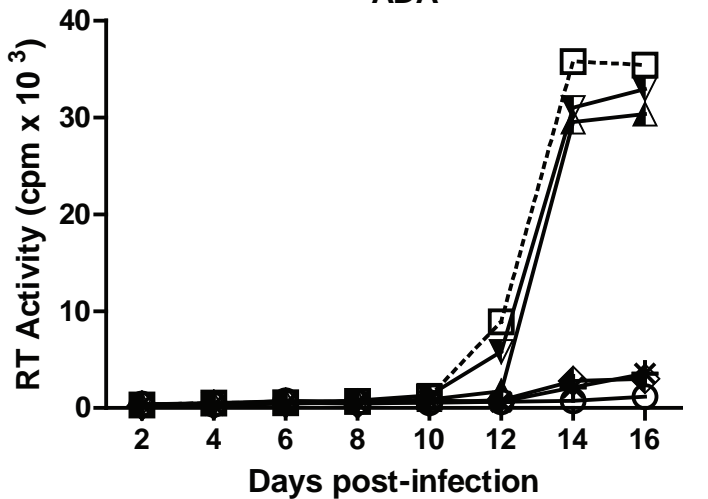

- mock infection
- △ anti-Trx 5 ug/mL
- ◇ anti-PDI 50 ug/mL
- Control (medium)
- ▽ anti-Trx 50 ug/mL
- \* DTNB 5 mM

### C

#### HIV-1<sub>LAV</sub>

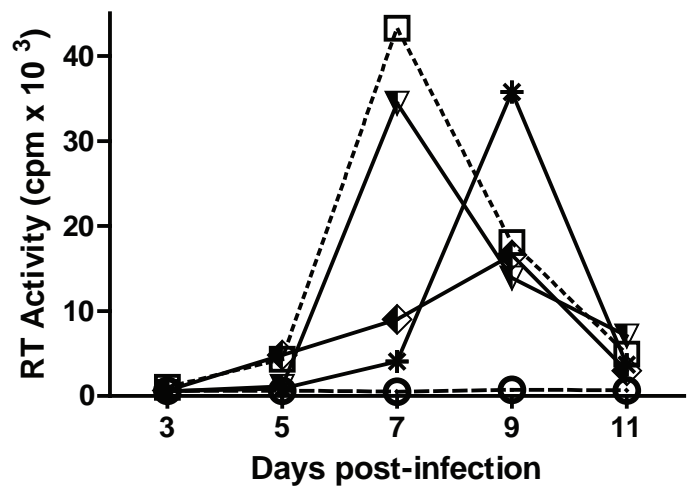

- mock infection
- ◇ anti-PDI 50 ug
- \* DTNB 5 mM
- Control (iso IgG)
- ▽ anti-Trx 50 ug
