# Supplementary figures and images for: Cell-type specific requirements for thiol/disulfide exchange during HIV-1 entry and infection
Source: Springer Nature journal article supplement (doi:10.1186/1742-4690-9-97), 2012-12-01

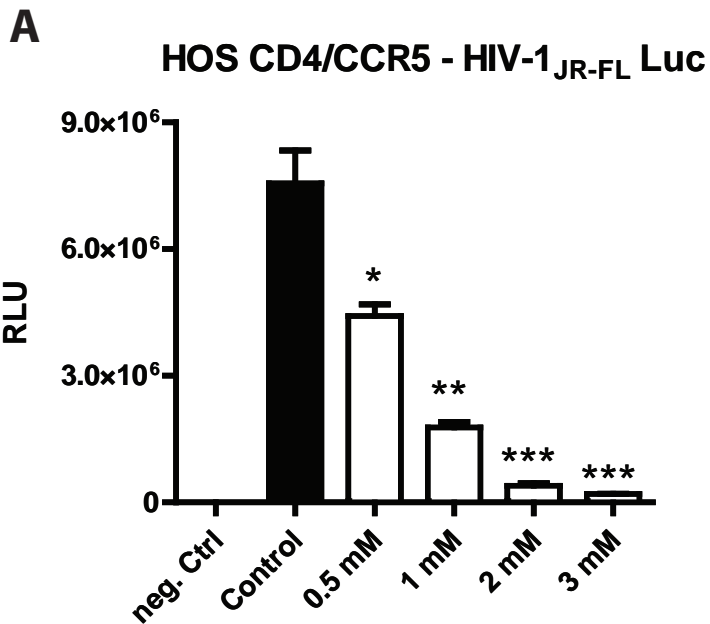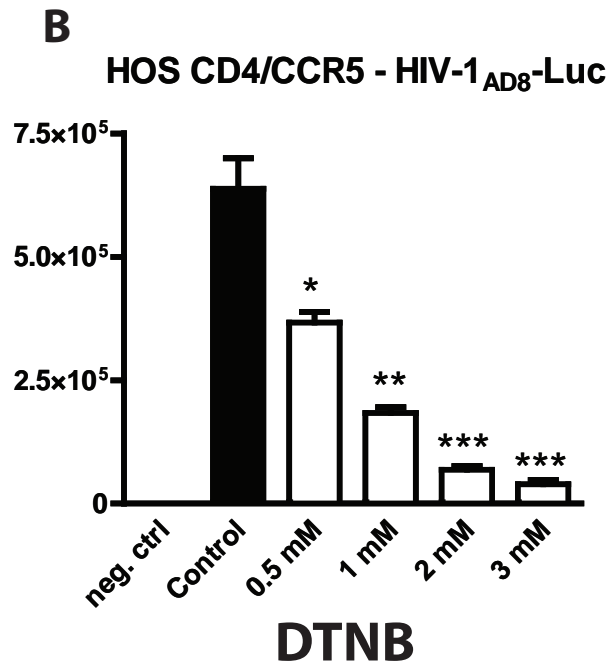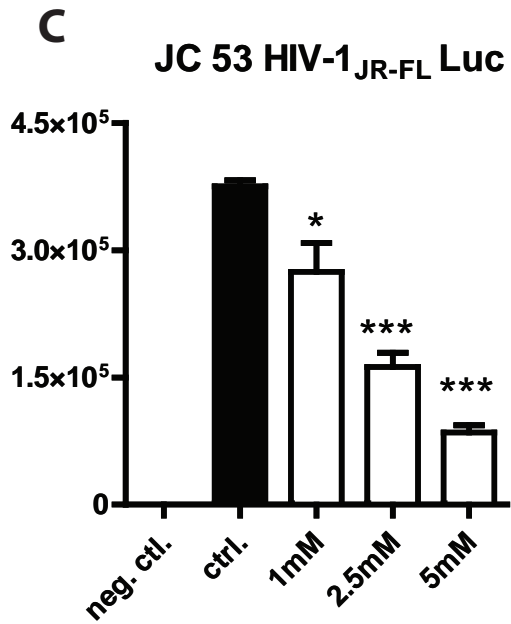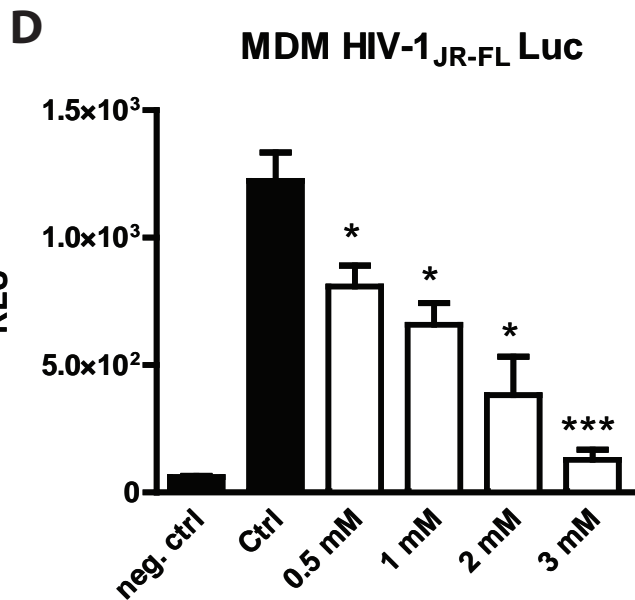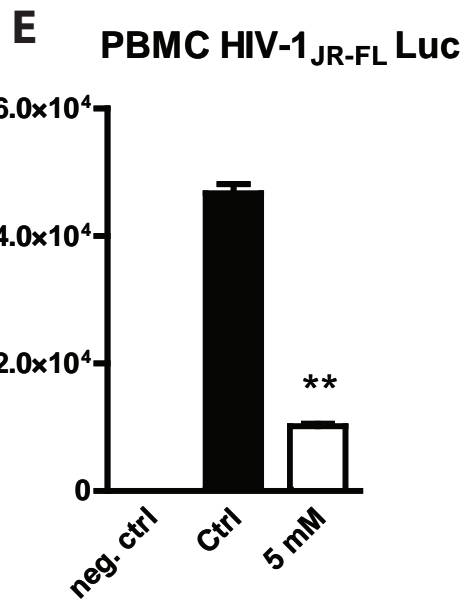

\* P<0.05  
 \*\* P<0.01  
 \*\*\* P<0.001

**DTNB**

Supplement: 12977_2012_3370_MOESM1_ESM.pdf [file 12977_2012_3370_MOESM1_ESM.pdf]

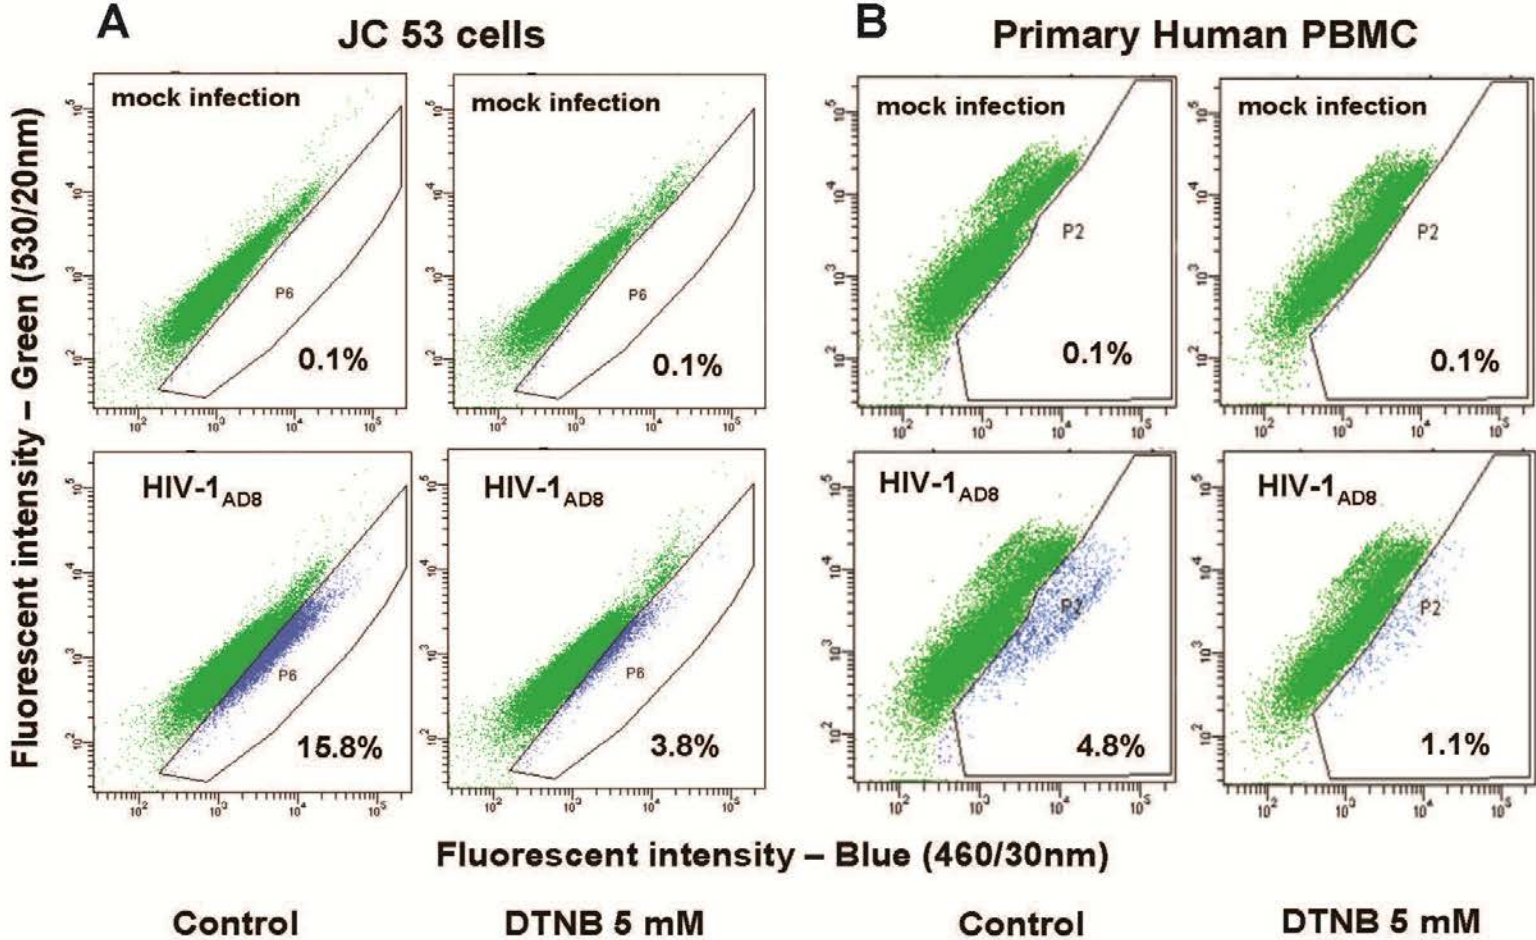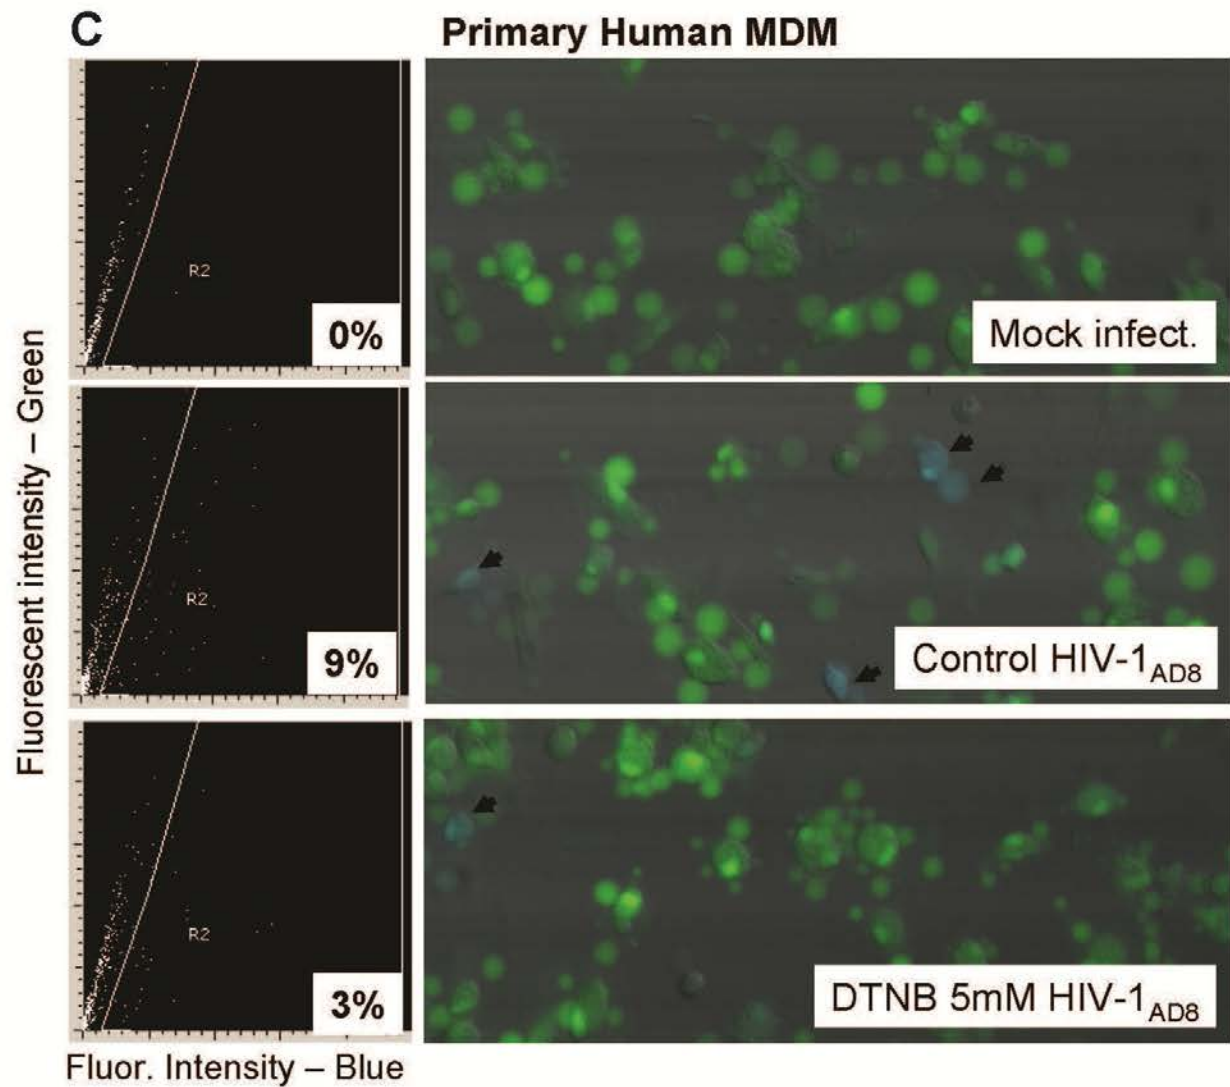

Supplement: 12977_2012_3370_MOESM2_ESM.pdf [file 12977_2012_3370_MOESM2_ESM.pdf]

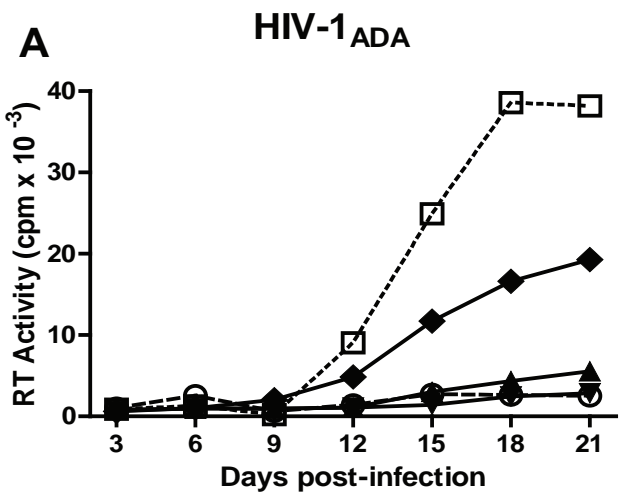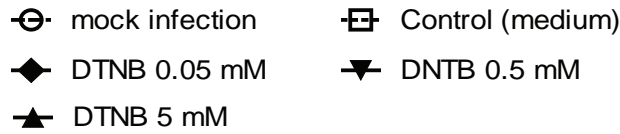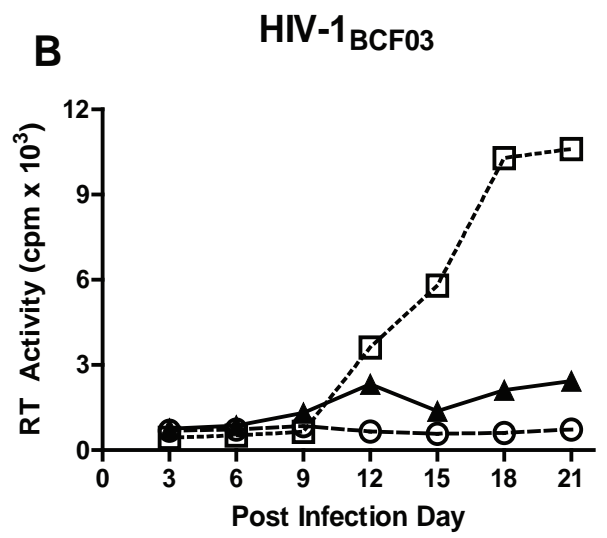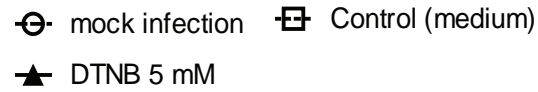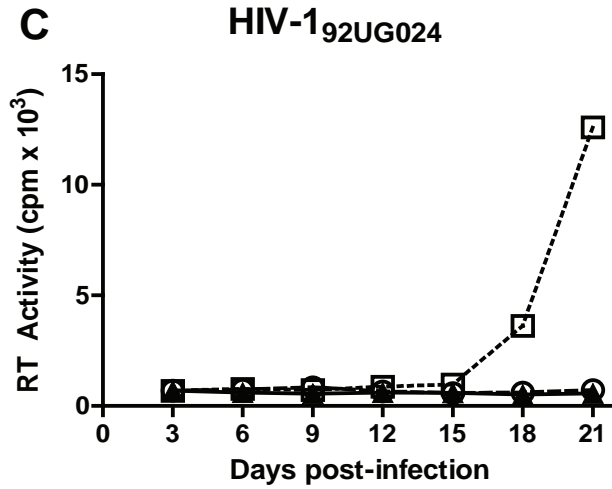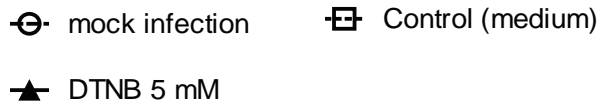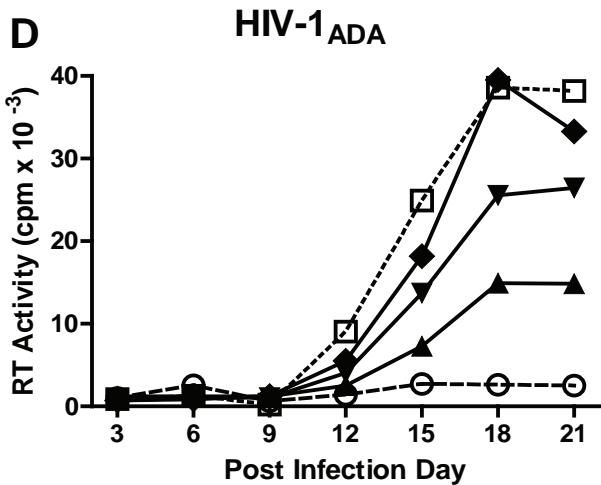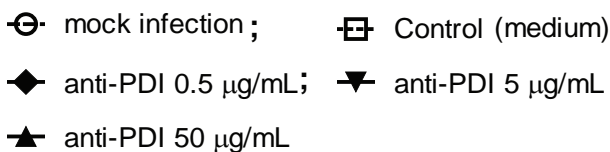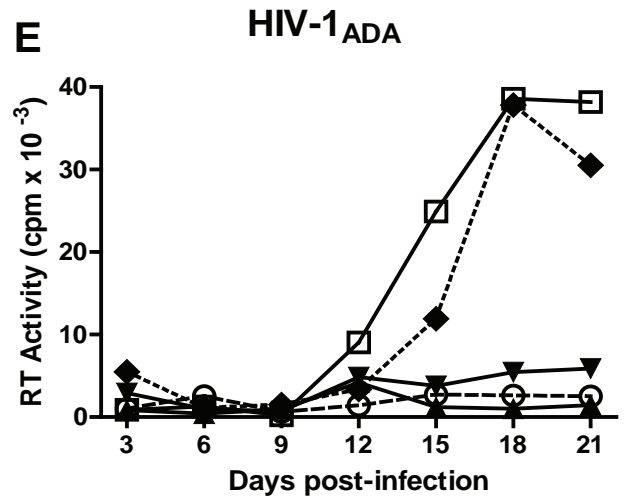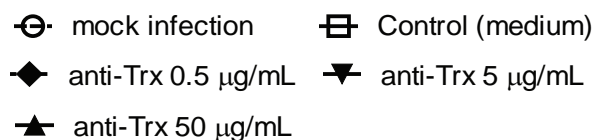

Supplement: 12977_2012_3370_MOESM3_ESM.pdf [file 12977_2012_3370_MOESM3_ESM.pdf]

# HIV-1<sub>JR-FL</sub> Luc

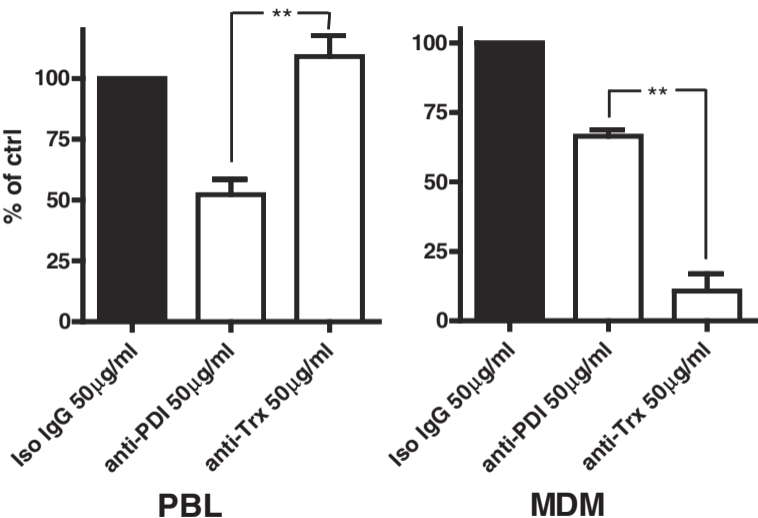

\*\* P < 0.01

Supplement: 12977_2012_3370_MOESM5_ESM.pdf [file 12977_2012_3370_MOESM5_ESM.pdf]

**% of Max. (cell count)**

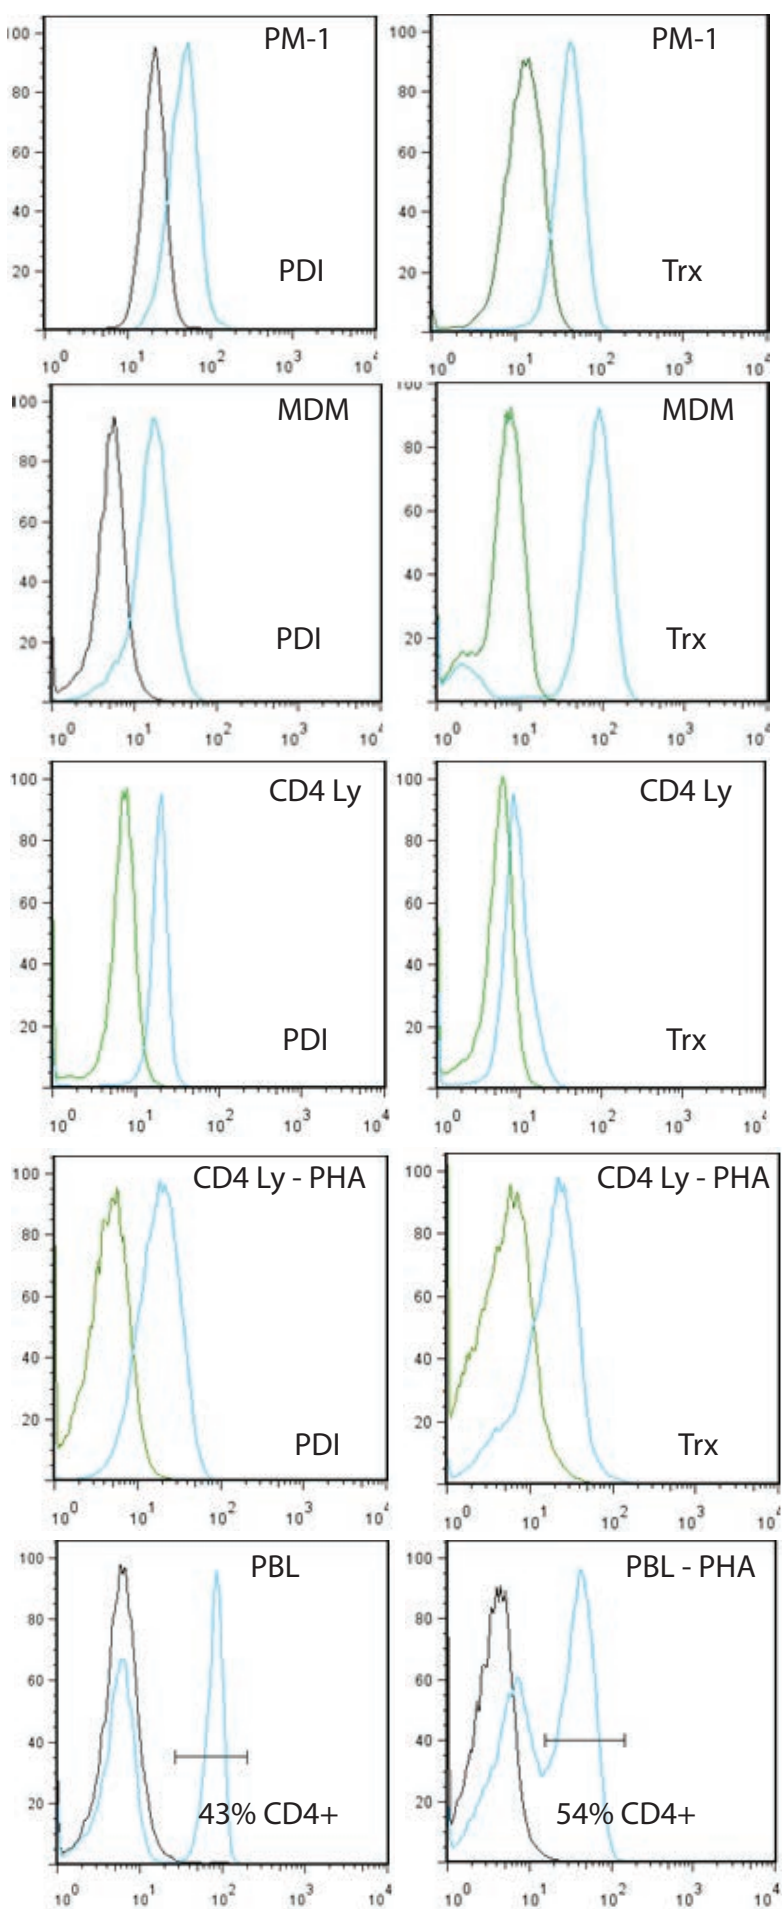

**Fluorescent intensity**

Supplement: 12977_2012_3370_MOESM6_ESM.pdf [file 12977_2012_3370_MOESM6_ESM.pdf]
